# Supplementary material
Source: PubMed Central journal article supplement (PMC2562057)

## Supplementary Materials: Balan et al.

### Experimental Procedures

**NAD<sup>+</sup>/NADH level Quantification:** The nicotinamide nucleotide concentrations were determined using an NAD<sup>+</sup>/NADH Quantification kit purchased from BioVision (Mountain View, CA). For each point, 10 decapitated 5 days old flies were pooled and homogenized in 400  $\mu$ l of extraction buffer (supplied with the kit) and clarified of debris by centrifugation. Samples containing 5 to 50  $\mu$ g of protein were used for the assay according to the manufacturer's protocol. Nucleotide concentrations were assayed in the linear range of the calibration curve and calculated based on standards provided with the kit.

### Figure legends

**Supplementary Fig. 1:** Alignment of *Drosophila* D-NAAM (accession no. NP\_732446; TPA accession no. BK005756), *Sacharomyces cerevisie* PNC1 (accession no. AY558481) and *Pyrococcus horikoshii* PH999 (accession no. BAA30096) using the ESPript program. Identities are highlighted and conserved residues are boxed. Residues described as important for nicotinamidase catalytic activity (36) are underscored with triangles.

**Supplementary Fig. 2:** Expression of V5-D-NAAM protein in pUAST-D-NAAM male and female transgenic lines in tubulin-Gal4 or *elav*-Gal4 driver backgrounds was analyzed using V5 immunoblotting (top panel). Equal protein loading was verified using tubulin immunoblotting (bottom panel).

## Supplementary Table 1

### Effect of D-NAAM overexpression on NAD<sup>+</sup>/NADH levels

| Genotype                           | Gender | [total NAD] | [NADH]      | NAD <sup>+</sup> /NADH |
|------------------------------------|--------|-------------|-------------|------------------------|
| W <sup>1118</sup>                  | M      | 2.71 ± 0.06 | 1.81 ± 0.03 | 0.50 ± 0.06            |
| UAS-D-NAAM <sup>42</sup> /tub-Gal4 | M      | 2.36 ± 0.11 | 1.29 ± 0.02 | 0.83 ± 0.11            |
| W <sup>1118</sup>                  | F      | 5.43 ± 0.31 | 0.86 ± 0.03 | 5.34 ± 0.58            |
| UAS-D-NAAM <sup>42</sup> /tub-Gal4 | F      | 5.56 ± 0.12 | 0.73 ± 0.01 | 6.66 ± 0.23            |

pg/ug protein      pg/ug protein

The experiment was performed in triplicates and is representative of 3 independent experiments

**Supplementary Table 2**  
**D-NAAM overexpression extends fly lifespan**

| Genotype                                            | <b>Females</b>              |                          |                     |                            |                         |                     |
|-----------------------------------------------------|-----------------------------|--------------------------|---------------------|----------------------------|-------------------------|---------------------|
|                                                     | Mean lifespan control flies | Mean lifespan test flies | %Change (* p<0.001) | Max lifespan control flies | Max lifespan test flies | %Change (* p<0.001) |
| UAS-D-NAAM <sup>33</sup> /tub-Gal4                  | 39.05                       | 43.48                    | 11                  | 62.73                      | 69.81                   | 11 (*)              |
| UAS-D-NAAM <sup>31</sup> /tub-Gal4                  | 45.75                       | 50.05                    | 9                   | 65.54                      | 77.02                   | 18 (*)              |
| UAS-D-NAAM <sup>42</sup> /tub-Gal4                  | 48.25                       | 52.16                    | 8                   | 68.17                      | 80.13                   | 18 (*)              |
| UAS-D-NAAM <sup>33</sup> /elav-Gal4                 | 47.77                       | 51.04                    | 7                   | 66.35                      | 72.83                   | 10 (*)              |
| UAS-D-NAAM <sup>31</sup> /elav-Gal4(chromosome II)  | 41.07                       | 48.23                    | 17 (*)              | 59.38                      | 71.67                   | 21 (*)              |
| UAS-D-NAAM <sup>31</sup> /elav-Gal4(chromosome III) | 47.11                       | 57.61                    | 22 (*)              | 69.67                      | 77.39                   | 14 (*)              |
| UAS-D-NAAM <sup>42</sup> /elav-Gal4                 | 47.51                       | 61.26                    | 29 (*)              | 66.04                      | 80.56                   | 22 (*)              |
| Genotype                                            | <b>Males</b>                |                          |                     |                            |                         |                     |
|                                                     | Mean lifespan control flies | Mean lifespan test flies | %Change (* p<0.001) | Max lifespan control flies | Max lifespan test flies | %Change (* p<0.001) |
| UAS-D-NAAM <sup>33</sup> /tub-Gal4                  | 38.99                       | 43.88                    | 13                  | 58.81                      | 64.97                   | 10 (*)              |
| UAS-D-NAAM <sup>31</sup> /tub-Gal4                  | 39.97                       | 50.41                    | 26 (*)              | 57.18                      | 68.23                   | 19 (*)              |
| UAS-D-NAAM <sup>42</sup> /tub-Gal4                  | 42.05                       | 46.83                    | 11                  | 61.51                      | 69.05                   | 12 (*)              |
| UAS-D-NAAM <sup>33</sup> /elav-Gal4                 | 43.56                       | 50.26                    | 15 (*)              | 61.84                      | 67.63                   | 9 (*)               |
| UAS-D-NAAM <sup>31</sup> /elav-Gal4(chromosome II)  | 37.49                       | 44.63                    | 19 (*)              | 48.76                      | 59.79                   | 23 (*)              |
| UAS-D-NAAM <sup>31</sup> /elav-Gal4(chromosome III) | 43.71                       | 57.01                    | 30 (*)              | 59.14                      | 71.03                   | 20 (*)              |
| UAS-D-NAAM <sup>42</sup> /elav-Gal4                 | 35.12                       | 42.71                    | 22 (*)              | 49.19                      | 56.64                   | 15 (*)              |



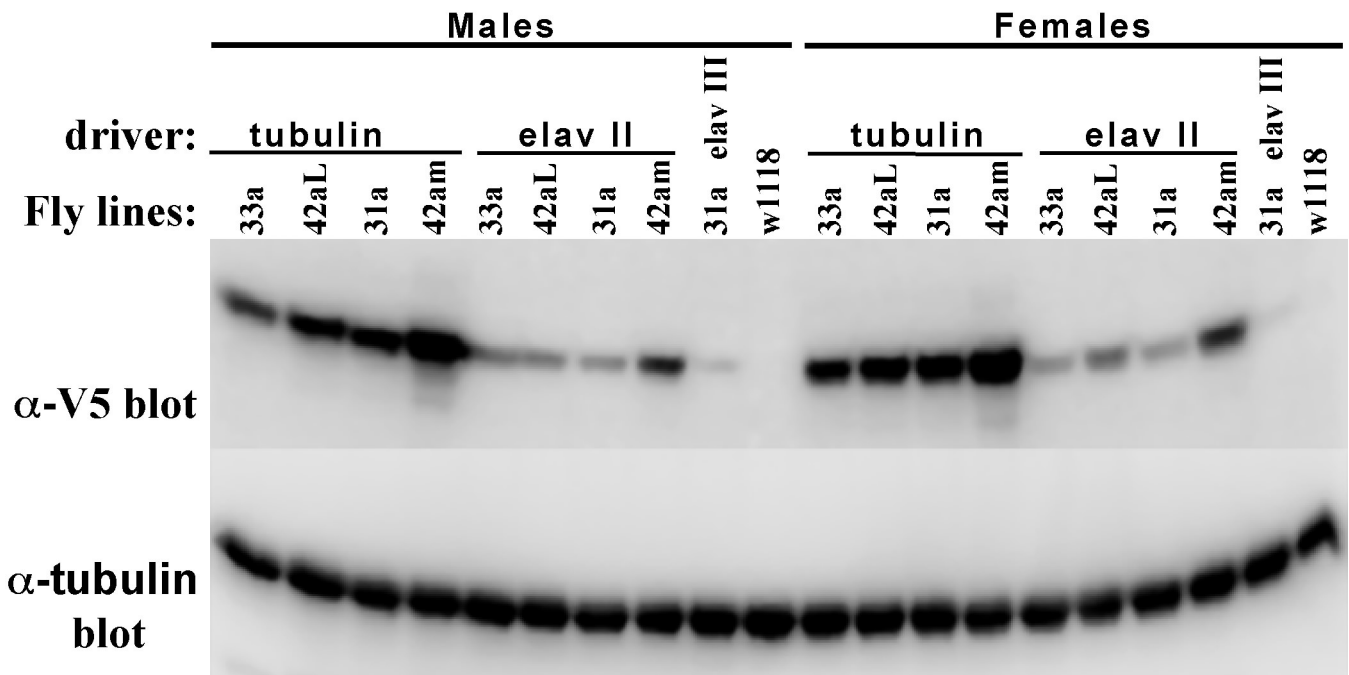

Supplement: M804681200_1.pdf [file M804681200_1.pdf]
